# Supplementary material for: Blue-Light-Blocking Lenses Ameliorate Structural Alterations in the Rodent Hippocampus
Source: MDPI journal article supplement (doi:10.3390/ijerph191912922), 2022-10-09
Supplement: s1 [file s1]

## Supplementary Figure S1

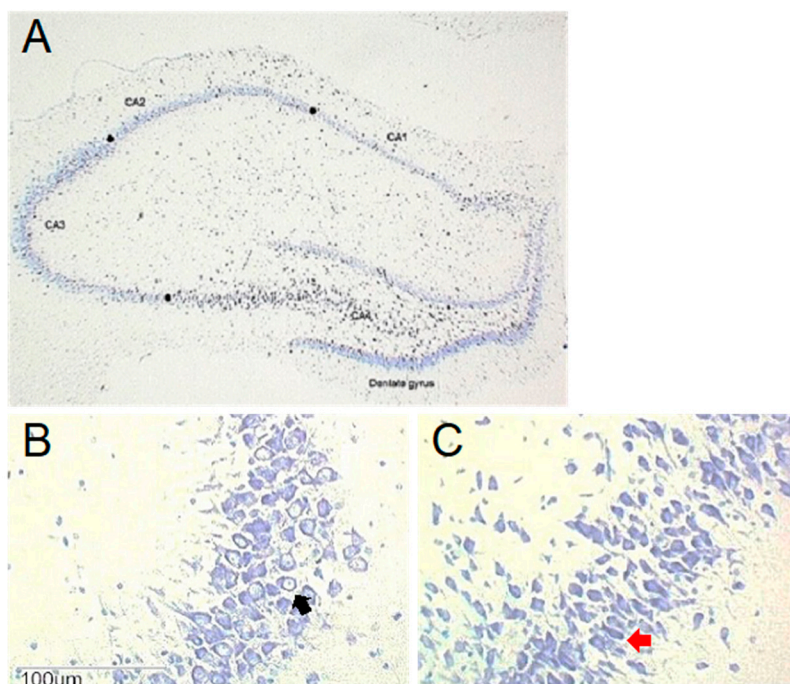

(A). Representative photomicrograph of labeled hippocampus regions. (B). Healthy neurons show a pale cytoplasm (indicated in black arrow) (C). Irregularly shaped hyper dense neuronal cell bodies (pyknotic cell) indicate a degenerated neuron (indicated in red arrow).
